# Supplementary material for: A ZnO/ZnFe2O4 n–n heterojunction and Au loading synergistically improve the sensing performance of acetone
Source: Royal Society of Chemistry journal article supplement (doi:10.1039/d2qi01517j), 2022-01-01
Supplement: d2qi01517j1.pdf [file d2qi01517j1.pdf]

## Supporting information

### ZnO/ZnFe<sub>2</sub>O<sub>4</sub> n-n heterojunction and Au loading synergistically improve the sensing performance of acetone

Qixuan Qin,<sup>a</sup> Asu Li,<sup>b</sup> Yizhuo Fan,<sup>a</sup> Xindong Zhang<sup>\*a</sup>

<sup>a</sup>State Key Laboratory of Integrated Optoelectronics, College of Electronic Science and Engineering, Jilin University, 2699 Qianjin Street, Changchun 130012, People's Republic of China.

<sup>b</sup> Key Laboratory of Geophysical Exploration Equipment, Ministry of Education, College of Instrumentation and Electrical Engineering, Jilin University, Changchun 130000, China

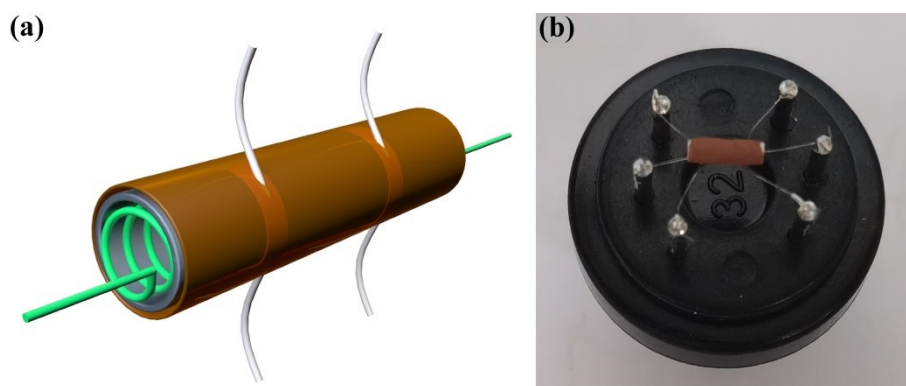

**Fig. S1.** (a) Schematic diagram of the gas sensor; (b) Example image of the fabricated gas sensor.

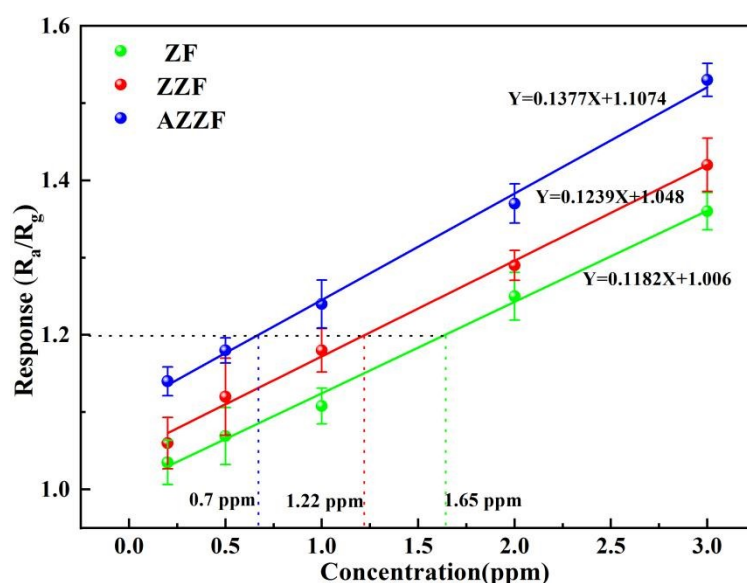

**Fig. S2.** Responses of ZF, ZZF, and AZZF based sensors as a function of acetone concentration (0.2-3 ppm) at 85% RH.

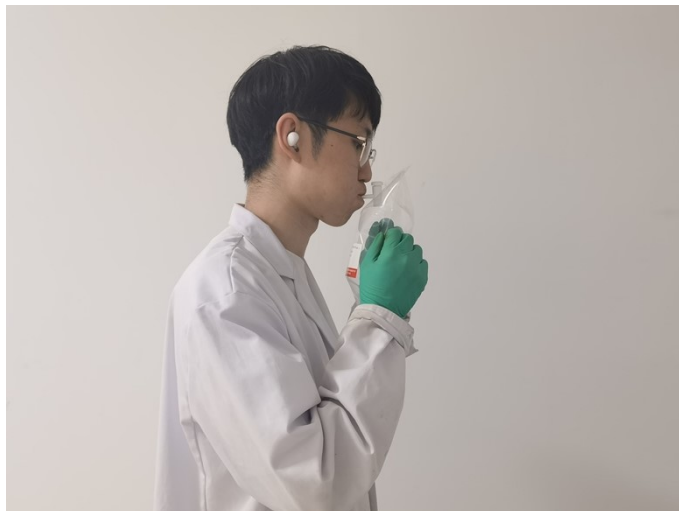

**Fig. S3.** Exhaled breath collected from a subject using a fluorine membrane collection bag.

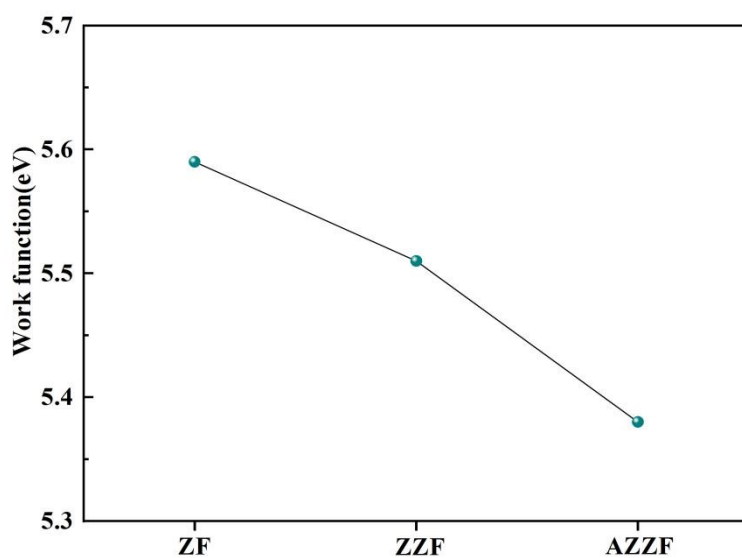

**Fig. S4.** Work function of ZF, ZZF, and AZZF via Kelvin Probe.

**Table. S1.** Structural Information of ZF, ZZF, and AZZF.

| Samples | Specific surface<br>( $\text{m}^2\text{g}^{-1}$ ) | Pore size<br>(nm) | Pore volume<br>( $\text{cm}^3\text{g}^{-1}$ ) |
|---------|---------------------------------------------------|-------------------|-----------------------------------------------|
| ZF      | 138.2                                             | 13.5              | 9.58                                          |
| ZZF     | 159.8                                             | 10.32             | 4.26                                          |
| AZZF    | 165.1                                             | 9.84              | 3.45                                          |
